# Supplementary material for: Summertime ozone pollution in China affected by stratospheric quasi-biennial oscillation
Source: Copernicus journal article supplement (doi:10.5194/acp-23-1533-2023), 2023-01-26
Supplement: Supplementary file 1 [file acp-23-1533-2023-supplement.pdf]

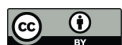

*Supplement of*

## **Summertime ozone pollution in China affected by stratospheric quasi-biennial oscillation**

**Mengyun Li et al.**

*Correspondence to:* Yang Yang ([yang.yang@nuist.edu.cn](mailto:yang.yang@nuist.edu.cn))

The copyright of individual parts of the supplement might differ from the article licence.

**Table S1.** Net rate of change in O<sub>3</sub> mass (Tg Season<sup>-1</sup>) of various processes from surface to the PBL over central China (92.5–112.5°E, 26–38°N) during the selected three QBOW (1990, 1997, 2019) years and QBOE years (1994, 2012, 2018) and their differences (QBOW-QBOE).

|            | Net chemical<br>production | Horizontal<br>advection | Diffusion<br>and dry<br>deposition | Vertical<br>convection |
|------------|----------------------------|-------------------------|------------------------------------|------------------------|
| QBOW       | 7.42                       | -0.35                   | -6.42                              | 0.43                   |
| QBOE       | 7.53                       | -0.35                   | -6.31                              | 0.34                   |
| Difference | -0.09                      | 0.00                    | -0.11                              | 0.09                   |

**Table S2.** The horizontal and vertical mass flux (Tg) of JJA O<sub>3</sub> concentration from the surface to 850 hPa over central China (92.5–112.5°E, 26–38°N) based on NO\_CHN simulation. The values are averaged over the selected three QBOW years (1990, 1997, 2019) and QBOE years (1994, 2012, 2018) and their differences (QBOW-QBOE). Positive values indicate incoming fluxes and negative values indicate outgoing fluxes.

|                      | QBOW  | QBOE  | Difference |
|----------------------|-------|-------|------------|
| Horizontal mass flux |       |       |            |
| East                 | 0.44  | 1.15  | -0.71      |
| West                 | 0.95  | 0.80  | 0.15       |
| North                | 0.77  | 0.09  | 0.68       |
| South                | 3.20  | 3.34  | -0.14      |
| Vertical mass flux   |       |       |            |
| Top                  | -4.11 | -4.49 | 0.38       |
